# 1 RefSeq database growth influences the accuracy of $k$ -mer-based 2 species identification

3 Daniel J. Nasko<sup>1</sup>, Sergey Koren<sup>2</sup>, Adam M. Phillippy<sup>2</sup>, and Todd J. Treangen<sup>1\*</sup>

4 <sup>1</sup> Center for Bioinformatics and Computational Biology, University of Maryland, College Park,  
5 Maryland, USA.

6 <sup>2</sup> Genome Informatics Section, Computational and Statistical Genomics Branch, National Human  
7 Genome Research Institute, Bethesda, Maryland, USA.

8 \* treangen@umd.edu to whom correspondence should be addressed

9

## 10 ABSTRACT

11 Accurate species-level taxonomic classification and profiling of complex microbial communities  
12 remains a challenge due to homologous regions shared among closely related species and a  
13 sparse representation of non-human associated microbes in the database. Although the database  
14 undoubtedly has a strong influence on the sensitivity of taxonomic classifiers and profilers, to  
15 date, no study has carefully explored this topic on historical RefSeq releases and explored its  
16 impact on accuracy. In this study, we examined the influence of the database, over time, on  $k$ -  
17 mer based sequence classification and profiling. We present three major findings: (i) database  
18 growth over time resulted in more classified reads, but fewer species-level classifications and  
19 more species-level misclassifications; (ii) Bayesian re-estimation of abundance helped to recover  
20 species-level classifications when the exact target strain was present; and (iii) Bayesian re-  
21 estimation struggled when the database lacked the target strain, resulting in a notable decrease in  
22 accuracy. In summary, our findings suggest that the growth of RefSeq over time has strongly  
23 influenced the accuracy of  $k$ -mer based classification and profiling methods, resulting in

24 different classification results depending on the particular database used. These results suggest a  
25 need for new algorithms specially adapted for large genome collections and better measures of  
26 classification uncertainty.

27

28 Keywords: Taxonomic classification, Reference database, Metagenomics, Microbiome,  
29 Comparative analysis

30

## 31 **INTRODUCTION**

32 Fundamental questions of a metagenomic survey are: *(i)* what microbes are present in each  
33 sample, *(ii)* how abundant is each organism identified in a sample, *(iii)* what role might each  
34 microbe play (i.e. what gene functions are present) and *(iv)* how do the previous observations  
35 change across samples and time? Specifically, there have been numerous studies highlighting  
36 the utility of metagenomic datasets for pathogen detection, disease indicators, and health <sup>1,2</sup>.  
37 Addressing each of these fundamental questions is predicated on the ability to assign taxonomy  
38 and gene function to unknown sequences.

39

40 Several new tools and approaches for taxonomic identification of DNA sequences have emerged  
41 <sup>3-5</sup>, in addition to community-driven ‘bake-offs’ and benchmarks <sup>6</sup>. *k*-mer based classification  
42 methods such as Kraken or CLARK <sup>3,7</sup> are notable for their exceptional speed and specificity, as  
43 both are capable of analyzing hundreds of millions of short reads (ca. 100 base pairs) in a CPU  
44 minute. These *k*-mer based algorithms use heuristics to identify unique, informative, *k*-length  
45 subsequences (*k*-mers) within a database to help improve both speed and accuracy. A challenge  
46 for *k*-mer based classification approaches is that closely related species and strains often contain

47 many identical sequences within their genomes. This challenge is typically addressed by  
48 assigning the query sequence with the lowest common ancestor (LCA) of all species that share  
49 the sequence. A comprehensive benchmarking survey indicated that Kraken offered the best  $F_1$   
50 score (a measure considering both precision and recall) among the  $k$ -mer based taxonomic  
51 classifiers evaluated at the species level <sup>8</sup>. Bracken, a Bayesian method that refines Kraken  
52 results, is capable of estimating how much of each species is present among a set of ambiguous  
53 species classifications by probabilistically re-distributing reads in a taxonomic tree <sup>9</sup>. We thus  
54 selected Kraken and Bracken as representative tools from the genre of  $k$ -mer based classification  
55 methods. The focus on this study was not to examine a specific software tool, but rather to  
56 decouple the performance of  $k$ -mer based methods from the underlying database.

57  
58 Available  $k$ -mer based methods for taxonomic identification and microbiome profiling rely on  
59 existing reference databases. While several investigations have examined the influence of  
60 contamination in specific database releases, and identified idiosyncrasies specific to a release  
61 <sup>10,11</sup>, no study has examined the specific influence of perhaps the most popular database from  
62 which to build classification databases, the repository of sequenced and assembled microbes  
63 (RefSeq), across all releases of the database. Additionally, metagenomic classification and  
64 profiling tools are commonly compared to each other using simulated datasets on a fixed  
65 database, with leave-one-out analysis, but never compared to each other across recent trajectories  
66 in database growth. The aim of this study was to elucidate the influence of RefSeq database  
67 growth over time on the performance of  $k$ -mer based taxonomic identification tools.

68

## 69 **RESULTS**

## 70 **RefSeq database growth**

71 Since its release in June 2003 bacterial RefSeq, on average, has doubled in size (giga base pairs,  
72 Gbp) every 1.5 years (Fig. 1A), with the number of unique 31-mers in the database growing at a  
73 similar rate (Fig. 1B). A more recent release, bacterial RefSeq version 84 (released 9/11/2017),  
74 totaled over 700 Gbp of sequence data. The Simpson's index of diversity is a metric with values  
75 between zero and one that reports the probability that two individuals randomly selected from a  
76 sample will not belong to the same species. Samples with a high Simpson's index of diversity  
77 (i.e. closer to one) may be considered more diverse than those with low values (i.e. closer to  
78 zero). The diversity for each version of the bacterial RefSeq database increased until April 2013  
79 where the Simpson's index of diversity for each subsequent bacterial RefSeq release has trended  
80 downward (Fig. 1C). A slower growth is also seen in the number of new bacterial species in  
81 each RefSeq version, indicating many of the same species are being sequenced repeatedly (Fig.  
82 1D).

## 84 **Taxonomic classification over time with a simulated metagenome**

85 Kraken's own simulated validation set of ten known genomes was searched against nine versions  
86 of bacterial RefSeq (1, 10, 20, 30, 40, 50, 60, 70, 80) and the MiniKraken database (4GB  
87 version) (Fig. 2). The accuracy of each Kraken run depends on the RefSeq version used in the  
88 search (Fig. 2; Table 1). Correct genus-level classifications increased as RefSeq grew, but  
89 correct species-level classifications peaked at version 30 and tended to decline thereafter (Fig. 2).  
90 The decrease in correct species classifications is due to more closely-related genomes appearing  
91 over time in RefSeq, making it difficult for the classifier to distinguish them and forcing a move  
92 up to the genus level. Overall, misclassified species-level calls were consistently rare, as reads

93 were misclassified at the species level an average of 7% of the time (Table 1; Fig. 2). The  
94 fraction of reads classified at any taxonomic level, regardless of accuracy, increases as RefSeq  
95 grows over time (Fig. 3). However, the fraction of species-level assignments (again, regardless  
96 of accuracy) peaks at RefSeq version 30 and begins to decline thereafter, while the fraction of  
97 genus-level classifications begins to increase.

98  
99 Bracken was used to re-estimate the abundances of classifications made by Kraken when  
100 searching the simulated reads against eight bacterial RefSeq database versions (1, 10, 20, 30, 40,  
101 50, 60, 70). Bracken first derives probabilities that describe how much sequence from each  
102 genome is identical to other genomes in the database. This step requires searching a Kraken  
103 database against itself with Kraken, which could not be performed for the MiniKraken DB (as  
104 there is no FASTA file for this database) or bacterial RefSeq version 80 (as it would require  
105 extensive computation for a database that size). Bracken was able to re-estimate species  
106 abundances for 95% of the input data using RefSeq version 70, while Kraken only classified  
107 51% of reads at the species level. Because Bracken may probabilistically distribute a single  
108 read's classification across multiple taxonomy nodes, its performance must be measured in terms  
109 of the predicted abundances. Bracken typically included the correct species in its re-estimation,  
110 but sometimes included incorrect species in the abundance estimation (on average 15% of reads  
111 were associated with a genome outside of the ten knowns).

112

### 113 **Taxonomic classification of difficult to classify genomes over time**

114 The challenging nature of classifying sequences belonging to the *Bacillus cereus* sensu lato  
115 group has been previously documented<sup>12,13</sup>. The *B. anthracis* species within this group is a well-

116 defined monophyletic subclade of the larger *B. cereus* group, and the base of the *B. anthracis*  
117 clade is commonly denoted by a single nonsense mutation in the *plcR* gene<sup>14</sup> which is conserved  
118 in all known *B. anthracis* genomes and has been shown to confer a regulatory mutation essential  
119 for maintaining the pXO1 and pXO2 plasmids that carry the virulence factors characteristic of  
120 anthrax<sup>15</sup>. However, not all *B. anthracis* cause disease in humans, such as *B. anthracis* Sterne  
121 (missing the pXO2 plasmid) and some *B. cereus* strains do cause anthrax-like disease<sup>16</sup>,  
122 complicating a precise species definition. Thus, it is not a surprise that accurate species-level  
123 classification within this group has proven challenging for *k*-mer based methods, especially those  
124 methods not based on phylogenetic evidence. To demonstrate how difficult sequences from this  
125 group have been to classify over time, simulated reads were created for two *Bacillus cereus*  
126 strains. The first, *B. cereus* VD118, is a strain available in RefSeq version 60 and beyond, and  
127 the second, *B. cereus* ISSFR-23F<sup>17</sup>, was recently isolated from the International Space Station  
128 and is not present in any of the RefSeq releases tested. It is phylogenetically close to *B.*  
129 *anthracis*, but lacks the phylogenetic and species characteristics of *B. anthracis*. Again, as  
130 bacterial RefSeq grows over time, the number of genus-level classifications made by Kraken  
131 increases (Fig. 4). While the number of genus-level calls made by Kraken increases over time  
132 the number of unclassified and misclassified species calls decreases (most commonly *B.*  
133 *anthracis*, *B. thuringensis*, and *B. weihenstephanensis*).

134  
135 Bracken made species-level predictions for all reads no matter which version of bacterial RefSeq  
136 was used (Fig. 4). However, the increased rate of species-level predictions came at the cost of  
137 accuracy, as Bracken correctly identified *B. cereus* VD118 and *B. cereus* ISSFR-23F an average  
138 of 72% and 29% of the time, respectively, across RefSeq versions 1 through 70. The fraction of

139 reads assigned to each *Bacillus* species varied substantially from each database tested. The range  
140 of *Bacillus* species predictions for *B. cereus* VD118 were: *B. cereus* 81% (max=100%,  
141 min=18%), *B. anthracis* 48% (max=48%, min=0%), *B. thuringiensis* 23% (max=23%, min=0%),  
142 and *B. weihenstephanensis* 76% (max=76%, min=0%). While the range of *Bacillus* species  
143 predictions for *B. cereus* ISSFR-23F were: *B. cereus* 45% (max=50%, min=5%), *B. anthracis*  
144 90% (max=95%, min=5%), and *B. thuringiensis* 54% (max=54%, min=0%).

145

#### 146 **CPU/Memory performance over time**

147 Historical bacterial RefSeq versions were recreated and used to build Kraken databases with  
148 default settings. While most databases were constructed with ease and in less than a day, version  
149 70 required 500 GB of RAM and 2 days (single compute node using on 64 cores), while version  
150 80 required ca. 2.5 TB of RAM and ca. 11 days (single compute node using on 64 cores). Given  
151 this trend, future releases will likely require over 4 TB of RAM and weeks of computation to  
152 build, putting into question the feasibility of building and profiling *k*-mer databases on future  
153 RefSeq versions. Recent studies<sup>18</sup> have suggested alternative approaches for database  
154 construction that would help to circumvent future computational bottlenecks.

155

#### 156 **DISCUSSION**

157 The results of our study support three conclusions: (i) the RefSeq bacterial database composition  
158 and diversity is dynamic, varying from release to release; (ii) the database composition strongly  
159 influences the performance of *k*-mer based taxonomic identification methods, and (iii) Bayesian  
160 based methods can help mitigate some of the effect, but struggle with novel genomes that have  
161 close relatives in the database.

162

163 *Database influences on k-mer based taxonomic classification*

164 Using Bracken, the majority of *Bacillus cereus* ISSFR-23F simulated reads were not correctly  
165 assigned to *B. cereus* but were more frequently mis-assigned as *Bacillus anthracis* or *Bacillus*  
166 *thuringiensis* (Fig. 4B). This, in part, is not surprising as two of the three species in this group, *B.*  
167 *cereus* and *B. thuringiensis*, have no clear phylogenetically defined boundary, though *B.*  
168 *anthracis* is phylogenetically distinct from *B. cereus* and *B. thuringiensis*. Furthermore, any two  
169 genomes within the *Bacillus cereus* sensu lato group are likely to be over 98% identical<sup>9</sup>. Given  
170 that *k*-mer based methods are not phylogenetically-grounded, but rather based on sequence  
171 composition, they are susceptible to misidentification in clades where the taxonomy is in partial  
172 conflict with phylogeny, such as the *Bacillus cereus* sensu lato group. One clear example of  
173 misidentification within this group was the false identification Anthrax in public transit systems  
174 <sup>19,20</sup>.

175

176 Another observation worth highlighting is that the fraction of simulated reads classified as one of  
177 the three *B. cereus* sensu lato species varied across database versions (Fig. 4), with the exception  
178 of *B. cereus* VD118, which was present in RefSeq releases 60 and 70 (Fig. 4A). The variation in  
179 species classifications across database versions indicates that even when using the same tools to  
180 analyze the same dataset, the conclusions derived from this analysis can vary substantially  
181 depending on which version of a database you are searching against, especially for genomes  
182 belonging to difficult to classify species (i.e. require phylogenetic-based approaches).

183

184 *Imperfect data*



185 The genomic data deluge has helped to expand public repositories with a broader and deeper  
186 view of the tree of life, but has also brought with it contamination and misclassification.  
187 Contamination in public databases is well-documented<sup>21</sup> and represents an additional  
188 confounding factor for *k*-mer based methods. While several custom tools have been built to deal  
189 with imperfect data<sup>22</sup>, there is a need for database ‘cleaning’ tools that can preprocess a database  
190 and evaluate it for both contamination (genome assemblies that contain a mixture of species) and  
191 misclassified species and strains (genomes that are assigned a taxonomic ID that is inconsistent  
192 with its similarity to other genomes in the database). The misclassification issue often is in the  
193 eye of the beholder; species have been named based on morphology, ecological niche, toxin  
194 presence/absence, isolation location, 16S phylogenetic placement, and average nucleotide  
195 identity across the genome. This, coupled with an often ambiguous species concept in microbial  
196 genomes due to horizontal gene transfer and mobile elements<sup>23</sup>, brings into question the reliance  
197 on the current taxonomic structure for assigning names to microbes sequenced in metagenomic  
198 samples. A more robust approach would be for the classification databases to derive their own  
199 hierarchical structure directly from the data, rather than taxonomy, and then map back the  
200 internally derived hierarchy to widely-used taxonomic names.

201

## 202 **CONCLUSION**

203 Our findings demonstrate that changes in RefSeq over time have influenced the accuracy of *k*-  
204 mer based classification and profiling methods. Bayesian re-estimation approaches are helpful  
205 for species or strain level prediction but can result in false positives and are computationally  
206 prohibitive with larger databases. Despite recent progress in *k*-mer based methods for  
207 metagenome profiling and classification these tools should likely be used as step one in a multi-

208 step process, which also includes read mapping, assembly, feature prediction, and annotation.  
209 Additionally, priority should be given to the breadth, not depth, of species added to reference  
210 databases over time.

211

## 212 **METHODS**

### 213 **Acquisition of bacterial RefSeq databases versions 1 through 80**

214 FASTA files of previous versions of bacterial RefSeq are not publically available for download.  
215 Therefore, sequences from previous versions of bacterial RefSeq were acquired using custom  
216 scripts ([https://github.com/dnasko/refseq\\_rollback](https://github.com/dnasko/refseq_rollback)). Briefly, the process involved downloading  
217 the current bacterial RefSeq release (ver. 84 as of the date of the analysis) FASTA files  
218 (<ftp.ncbi.nlm.nih.gov/refseq/release/bacteria>) and concatenating them into one file. Then, the  
219 catalog file associated with the desired version is downloaded  
220 (<ftp.ncbi.nlm.nih.gov/refseq/release/release-catalog/archive>), which contains the identifiers for  
221 sequences present in that version of bacterial RefSeq. Sequence identifiers in that version's  
222 catalog file are pulled from the current RefSeq FASTA file and written to a new file. Using the  
223 `refseq_rollback.pl` script any version of bacterial RefSeq can be created. For this study only  
224 versions 1, 10, 20, 30, 40, 50, 60, 70, and 80 were recreated.

225

### 226 **Taxonomic classification on simulated datasets**

227 Two simulated read datasets were used to test Kraken and Bracken performance with different  
228 versions of the bacterial RefSeq database. The first simulated dataset was downloaded from the  
229 Kraken website ([ccb.jhu.edu/software/kraken](http://ccb.jhu.edu/software/kraken)) and was previously used in the Kraken manuscript  
230 as a validation set<sup>3</sup>. Briefly, this simulated dataset was composed of 10 known bacterial species:

231 *Aeromonas hydrophila* SSU, *Bacillus cereus* VD118, *Bacteroides fragilis* HMW 615,  
232 *Mycobacterium abscessus* 6G-0125-R, *Pelosinus fermentans* A11, *Rhodobacter sphaeroides*  
233 2.4.1, *Staphylococcus aureus* M0927, *Streptococcus pneumoniae* TIGR4, *Vibrio cholerae*  
234 CP1032(5), and *Xanthomonas axonopodis* pv. Manihotis UA323. Each genome had 1,000  
235 single-end reads (101 bp in size) for a total of 10,000 reads. We selected this dataset as it has  
236 been widely used as a benchmark for other *k*-mer based classification methods<sup>3,7</sup> and represents  
237 a breadth of species. This simulated read dataset was classified against each of the recreated  
238 bacterial RefSeq databases using Kraken (ver 1.0) with default settings.

239  
240 To test the ability to classify reads from genomes not in the bacterial RefSeq database 10,000  
241 simulated single-end Illumina reads (101 bp) were created using Grinder<sup>24</sup> with default settings  
242 from: (i) a *Bacillus cereus* genome, *B. cereus* VD118, not present in RefSeq until version 60 and  
243 beyond; and (ii) a novel *B. cereus* genome, *B. cereus* ISSFR-23F<sup>17</sup>, never present in any of the  
244 RefSeq versions tested. We decided to use these genomes as they are members of the *B. cereus*  
245 sensu lato group, containing a collection of species that are known to be challenging for *k*-mer  
246 methods to distinguish between<sup>19,20</sup>. These datasets were classified with Kraken (ver. 1.0) and  
247 Bracken (ver. 1.0.0)<sup>9</sup> both with default settings (Bracken “read-length” set to 101).

248

#### 249 **Running Bracken on Kraken output**

250 Bracken (ver. 1.0.0) was run on the output of each Kraken search (except for release 80 and  
251 KrakenMiniDB). Default parameters were used except for “read-length”, which was set to 101.

252

## 253 **Bacterial RefSeq diversity metric calculations**

254 Diversity metrics were calculated for every version of bacterial RefSeq (1-84) by parsing the  
255 catalog files for each version. An operational taxonomic unit (OTU) table was constructed using  
256 the NCBI taxonomy identifiers as taxonomic units (see `create_otu_table.pl` in the `refseq_rollback`  
257 repository). The OTU table was imported to QIIME (ver. MacQIIME 1.9.1-20150604)<sup>25</sup>.  
258 Diversity metrics (Simpson, Shannon, Richness) were calculated using the “`alpha_diversity.py`”  
259 script and plotted using the R base package.

260

## 261 **ABBREVIATIONS**

262 OTU: Operational taxonomic unit; LCA: Lowest common ancestor

## 263 **DECLARATIONS**

## 264 **Acknowledgements**

265 This work utilized the computational resources of the NIH HPC Biowulf cluster  
266 (<https://hpc.nih.gov>). The authors would like to thank Mihai Pop for his feedback and  
267 discussion of this project in its early development.

268

## 269 **Funding**

270 S.K. and A.M.P. were supported by the Intramural Research Program of the National  
271 Human Genome Research Institute, National Institutes of Health. D.J.N. and T.J.T  
272 were supported by the FunGCAT program from the Office of the Director of National  
273 Intelligence (ODNI), Intelligence Advanced Research Projects Activity (IARPA), via

274 the Army Research Office (ARO) under Federal Award No. W911NF-17-2-0089. The  
275 views and conclusions contained herein are those of the authors and should not be  
276 interpreted as necessarily representing the official policies or endorsements, either  
277 expressed or implied, of the ODNI, IARPA, ARO, or the US Government.

278

### 279 **Availability of Data and Materials**

280 Scripts used in this analysis are available on GitHub  
281 ([github.com/dnasko/refseq\\_rollback](https://github.com/dnasko/refseq_rollback)). Datasets and genomes used in this analysis are  
282 available online and referenced in the text.

283

### 284 **Authors' contributions**

285 T.J.T. and D.J.N. designed the experiments. D.J.N. wrote the analysis scripts. D.J.N.,  
286 S.K, and T.J.T. performed the experiments. D.J.N., S.K., A.M.P. and T.J.T. wrote the  
287 paper.

288

### 289 **Ethics approval and consent to participate**

290 NA

### 291 **Consent for publication**

292 NA

### 293 **Competing interests**

294 NA

295 **Additional files**

296

297 **REFERENCES**

- 298 1. Nakamura, S. *et al.* Direct metagenomic detection of viral pathogens in nasal and fecal  
299 specimens using an unbiased high-throughput sequencing approach. *PLoS One* **4**, 1–8  
300 (2009).
- 301 2. Greenblum, S., Turnbaugh, P. J. & Borenstein, E. Metagenomic systems biology of the  
302 human gut microbiome reveals topological shifts associated with obesity and in fl  
303 ammatory bowel disease. *Proc. Natl. Acad. Sci.* **109**, 594–599 (2012).
- 304 3. Wood, D. E. & Salzberg, S. L. Kraken: ultrafast metagenomic sequence classification  
305 using exact alignments. *Genome Biol.* **15**, R46 (2014).
- 306 4. Nguyen, N. P., Mirarab, S., Liu, B., Pop, M. & Warnow, T. TIPP: Taxonomic  
307 identification and phylogenetic profiling. *Bioinformatics* **30**, 3548–3555 (2014).
- 308 5. Ainsworth, D., Sternberg, M. J. E., Raczky, C. & Butcher, S. A. k-SLAM: accurate and  
309 ultra-fast taxonomic classification and gene identification for large metagenomic data sets.  
310 *Nucleic Acids Res.* **45**, 1649–1656 (2017).
- 311 6. Sczyrba, A. *et al.* Critical Assessment of Metagenome Interpretation - A benchmark of  
312 metagenomics software. *Nat. Methods* **14**, 1063–1071 (2017).
- 313 7. Ounit, R., Wanamaker, S., Close, T. J. & Lonardi, S. CLARK: fast and accurate  
314 classification of metagenomic and genomic sequences using discriminative k-mers. *BMC*  
315 *Genomics* **16**, 1–13 (2015).
- 316 8. McIntyre, A. B. R. *et al.* Comprehensive benchmarking and ensemble approaches for  
317 metagenomic classifiers. *Genome Biol.* **18**, 1–19 (2017).
- 318 9. Lu, J., Breitwieser, F. P., Thielen, P. & Salzberg, S. L. Bracken: estimating species  
319 abundance in metagenomics data. *PeerJ Comput. Sci.* **3**, e104 (2017).
- 320 10. Schäffer, A. A. *et al.* VecScreen\_plus\_taxonomy: imposing a tax(onomy) increase on  
321 vector contamination screening. *Bioinformatics* 1–5 (2017).  
322 doi:10.1093/bioinformatics/btx669
- 323 11. Pible, O., Hartmann, E. M., Imbert, G. & Armengaud, J. The importance of recognizing  
324 and reporting sequence database contamination for proteomics. *EuPA Open Proteomics* **3**,  
325 246–249 (2014).
- 326 12. Helgason, E. *et al.* *Bacillus anthracis*, *Bacillus cereus*, and *Bacillus thuringiensis* — One  
327 Species on the Basis of Genetic Evidence One Species on the Basis of Genetic Evidence.  
328 *Appl. Environ. Microbiol.* **66**, 2627–2630 (2000).
- 329 13. Zwick, M. E. *et al.* Genomic characterization of the *Bacillus cereus* sensu lato species:  
330 Backdrop to the evolution of *Bacillus anthracis*. *Genome Res.* **22**, 1512–1524 (2012).
- 331 14. Keim, P. *et al.* Anthrax molecular epidemiology and forensics: Using the appropriate  
332 marker for different evolutionary scales. *Infect. Genet. Evol.* **4**, 205–213 (2004).
- 333 15. Mignot, T. *et al.* The incompatibility between the PlcR- and AtxA-controlled regulons  
334 may have selected a nonsense mutation in *Bacillus anthracis*. *Mol. Microbiol.* **42**, 1189–  
335 1198 (2001).
- 336 16. Klee, S. R. *et al.* The genome of a *Bacillus* isolate causing anthrax in chimpanzees  
337 combines chromosomal properties of *B. cereus* with *B. anthracis* virulence plasmids. *PLoS*

- 338 *One* **5**, (2010).
- 339 17. Venkateswaran, K. *et al.* Draft genome sequences from a novel clade of *Bacillus cereus*  
340 Sensu Lato strains, isolated from the International Space Station. *Genome Announc.* **5**,  
341 e00680-17 (2017).
- 342 18. Zhou, W., Gay, N. & Oh, J. ReprDB and panDB: minimalist databases with maximal  
343 microbial representation. *Microbiome* **6**, 15 (2018).
- 344 19. Afshinnkoo, E. *et al.* Geospatial Resolution of Human and Bacterial Diversity with City-  
345 Scale Metagenomics. *Cell Syst.* **1**, 72–87 (2015).
- 346 20. The MetaSUB International Consortium. The Metagenomics and Metadesign of the  
347 Subways and Urban Biomes (MetaSUB) International Consortium inaugural meeting  
348 report. *Microbiome* **4**, 24 (2016).
- 349 21. Merchant, S., Wood, D. E. & Salzberg, S. L. Unexpected cross-species contamination in  
350 genome sequencing projects. *PeerJ* **2**, e675 (2014).
- 351 22. Schmieder, R. & Edwards, R. Fast identification and removal of sequence contamination  
352 from genomic and metagenomic datasets. *PLoS One* **6**, (2011).
- 353 23. Cohan, F. M. What are Bacterial Species? *Annu. Rev. Microbiol.* **56**, 457–487 (2002).
- 354 24. Angly, F. E., Willner, D., Rohwer, F., Hugenholtz, P. & Tyson, G. W. Grinder: a versatile  
355 amplicon and shotgun sequence simulator. *Nucleic Acids Res* **40**, e94 (2012).
- 356 25. Caporaso, J. G. *et al.* QIIME allows analysis of high- throughput community sequencing  
357 data. *Nat. Publ. Gr.* **7**, 335–336 (2010).
- 358
- 359

360 **Table 1. Fractions of unclassified (Unclass.), correctly classified (Correct), and misclassified**  
361 **(Misclass.) simulated reads from ten genomes using Kraken against different versions of**  
362 **bacterial RefSeq.**

| Release | Date       | Genus    |         |           | Species |           |
|---------|------------|----------|---------|-----------|---------|-----------|
|         |            | Unclass. | Correct | Misclass. | Correct | Misclass. |
| 1       | 2003-06-30 | 0.62     | 0.38    | 0.00      | 0.29    | 0.08      |
| 10      | 2005-03-06 | 0.53     | 0.46    | 0.01      | 0.38    | 0.07      |
| 20      | 2006-11-05 | 0.49     | 0.49    | 0.01      | 0.40    | 0.08      |
| 30      | 2008-07-07 | 0.25     | 0.74    | 0.00      | 0.60    | 0.07      |
| 40      | 2010-05-07 | 0.22     | 0.77    | 0.00      | 0.54    | 0.08      |
| 50      | 2011-11-08 | 0.21     | 0.78    | 0.01      | 0.52    | 0.07      |
| 60      | 2013-07-19 | 0.03     | 0.96    | 0.00      | 0.57    | 0.09      |
| 70      | 2016-03-03 | 0.03     | 0.95    | 0.01      | 0.42    | 0.09      |
| 80      | 2017-01-09 | 0.03     | 0.94    | 0.01      | 0.28    | 0.08      |

363



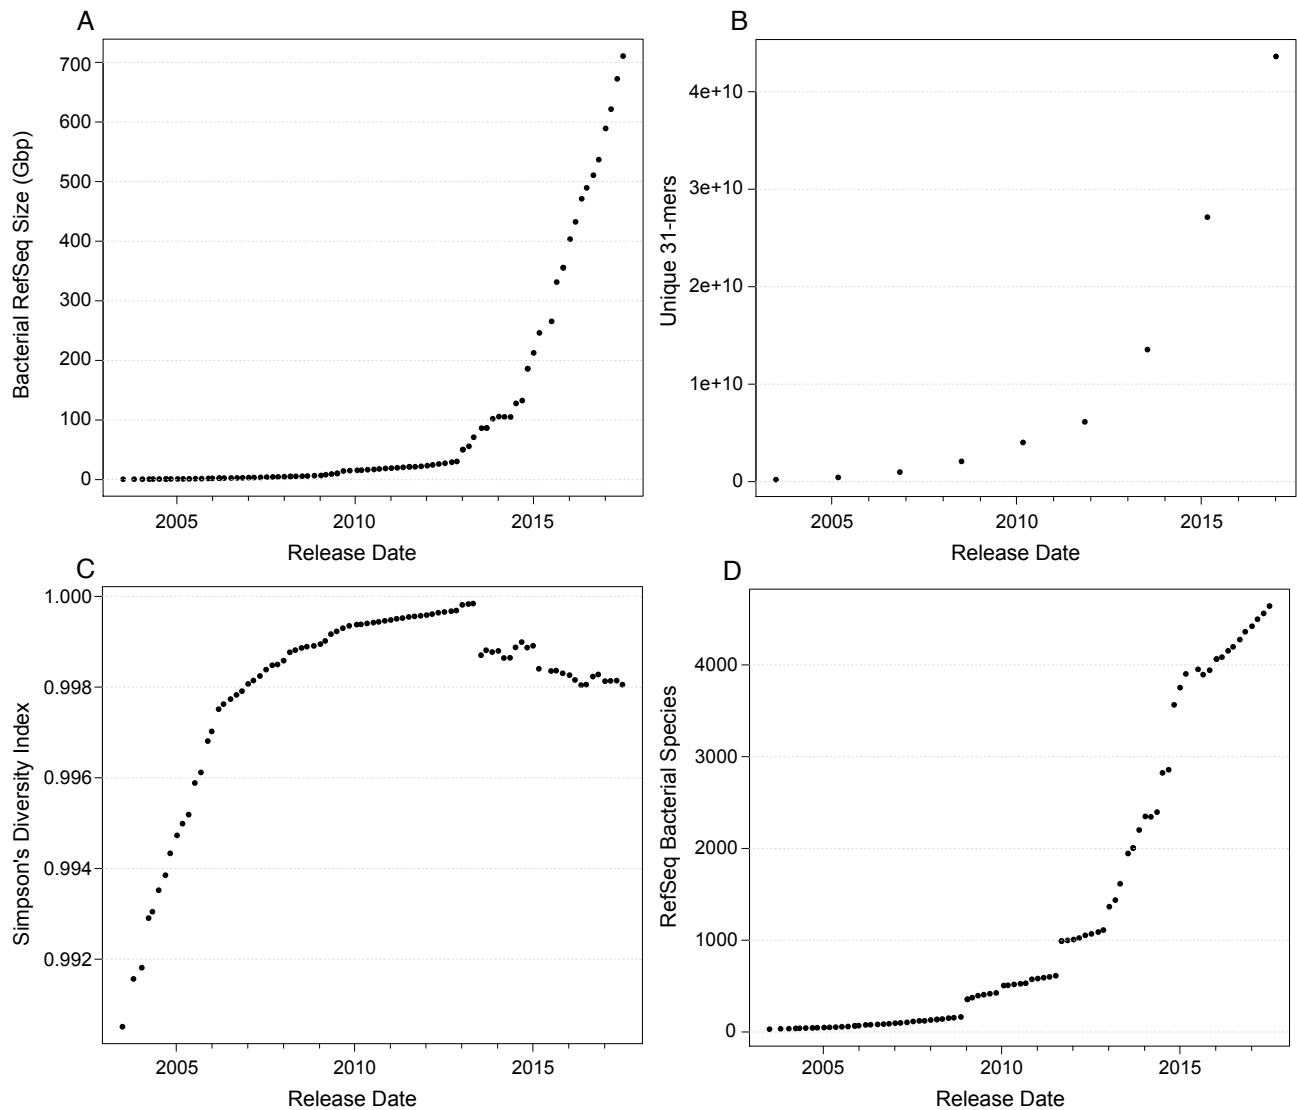

364

365 **Figure 1: Simpson diversity index of bacterial RefSeq has decreased every release since**

366 **April 2013.** (A) The number of base pairs in bacterial RefSeq continues to grow exponentially,

367 but (B) the number of unique 31-mers and (D) the number of bacterial species added increases

368 slower. (C) The Simpson's diversity index grew every release up to April 2013 where it has

369 declined every release since.

370

371

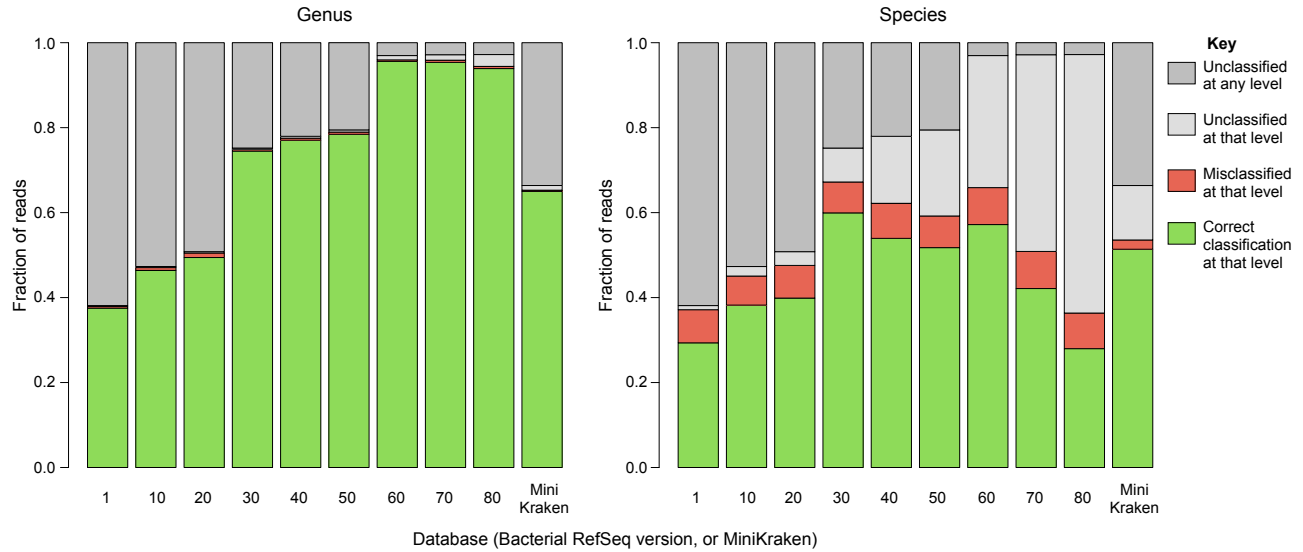

372

373 **Figure 2: The fraction of correct species classifications (right) decreases in later RefSeq**  
374 **database versions because they are only being classified at the genus level (left). Kraken**

375 classification results of simulated reads from known genomes against nine versions the bacterial  
376 RefSeq database and the MiniKraken database. Misclassifications at the genus and species  
377 levels remain consistently low across database versions.

378

379

380

381

382

383

384

385

386

387

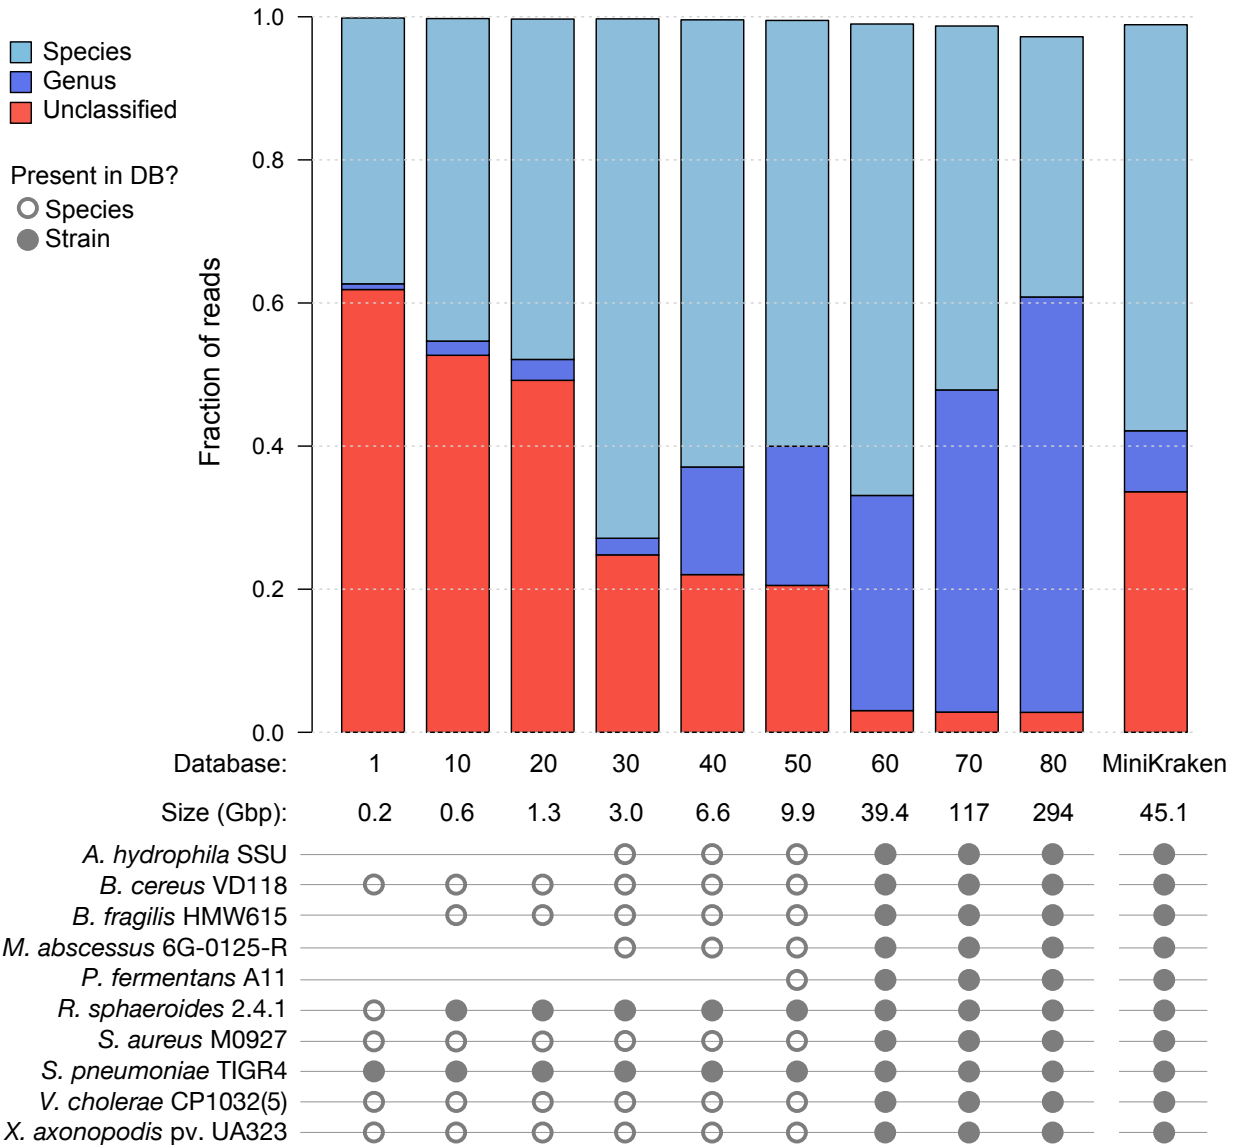

388

389 **Figure 3: Species-level classifications decrease, and genus-level classifications increase as**  
 390 **bacterial RefSeq grows.** Fraction of simulated reads classified at different taxonomic levels,  
 391 regardless of accuracy, using Kraken against ten databases. The circles below indicate when  
 392 each genome's species/strain is in a database. Although the MiniKraken database contains all 10  
 393 genomes it yields results comparable to bacterial RefSeq version 40.

394

395

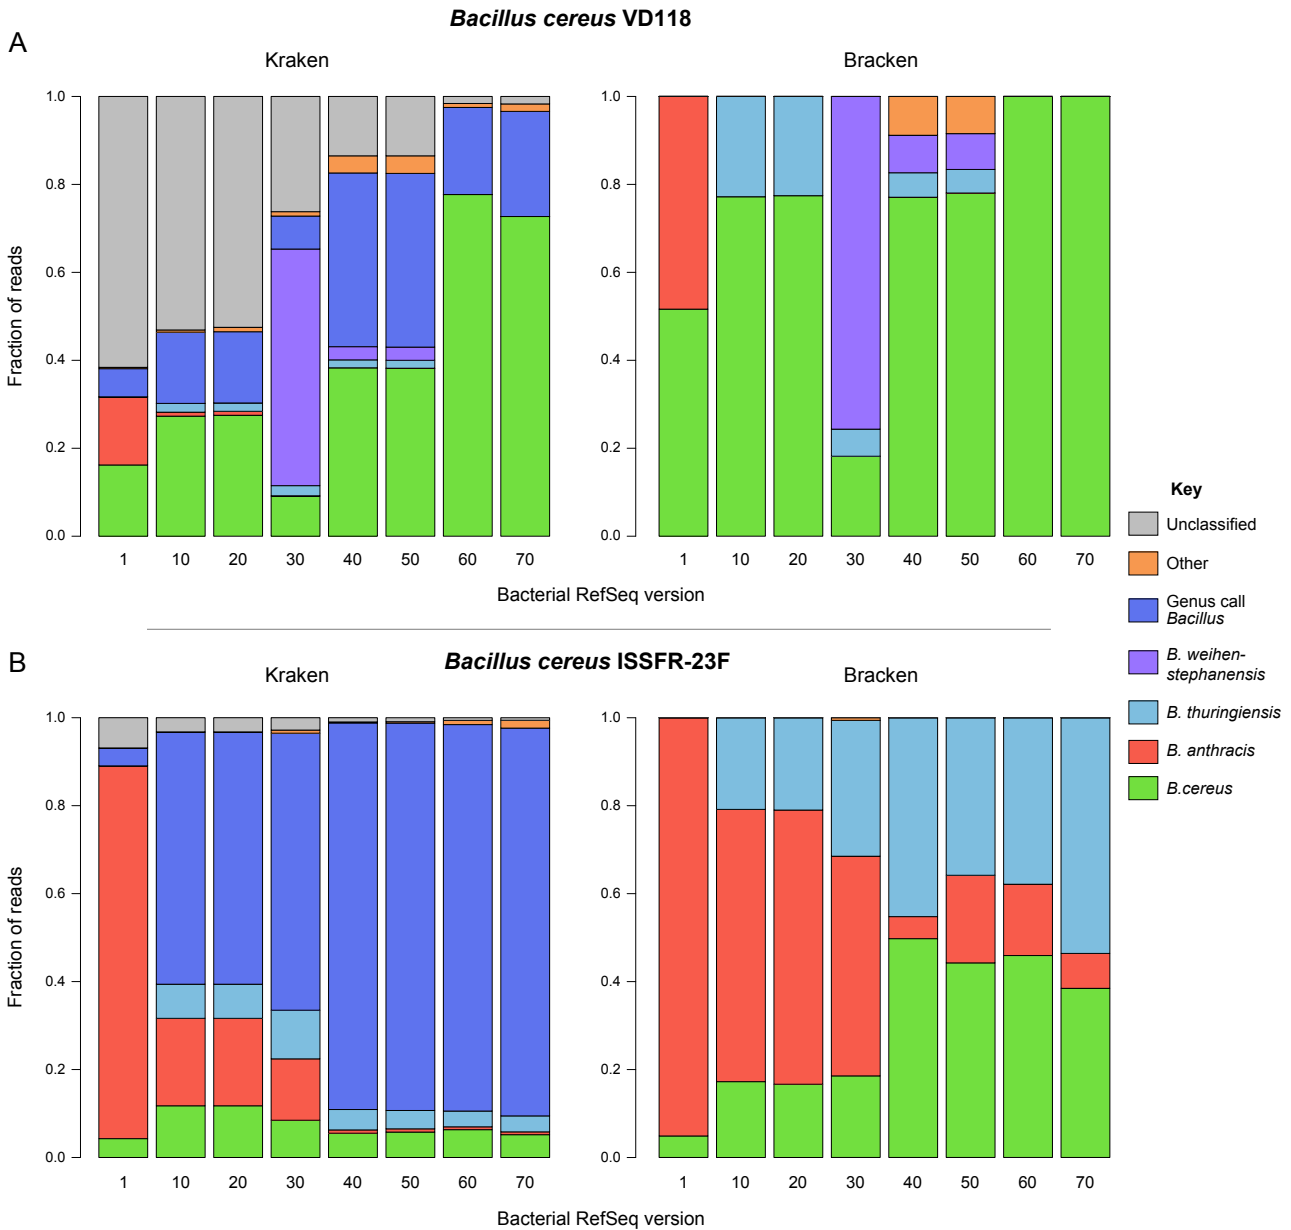

396

397 **Figure 4: The fraction of simulated reads classified among *Bacillus* species varied**  
 398 **considerably depending on which RefSeq version was used, demonstrating the influence of**  
 399 **the database on a *k*-mer based taxonomic classification. (A) Classifying simulated *B. cereus***  
 400 **VD118 reads with Kraken (left) and Bracken (right) against different version of RefSeq.**  
 401 **Species-level classifications varied, and the fraction of unclassified reads decreased with Kraken,**

402 as the database grew. Once *B. cereus* VD118 appeared in the database (ver. 60) Bracken  
403 correctly classified every read. **(B)** Species-level classifications decrease with Kraken as RefSeq  
404 grows using simulated reads from an environmental *Bacillus cereus* not in RefSeq. Fraction of  
405 simulated *B. cereus* ISSFR-23F reads classified using Kraken ver. 1.0 (left) and Bracken ver.  
406 1.0.0 (right) against different versions of bacterial RefSeq. Bracken classification pushed all  
407 reads to a species-level call, though these classifications were often for other *Bacillus* species.  
408
